# Supplementary material for: Stochastic simulations reveal few green wave surfing populations among spring migrating herbivorous waterfowl
Source: Nat Commun. 2019 May 16;10:2187. doi: 10.1038/s41467-019-09971-8 (PMC6522631; doi:10.1038/s41467-019-09971-8)
Supplement: Supplementary file 4 — Dataset 1 [file 41467_2019_9971_MOESM4_ESM.xlsx]

## Sheet: 1
Bird_ID	Year of migration	Species	No. stopovers	Mounting	Transmitter model	Sensor type	Mass (g)	Total number of locations	Total tracking period (days)	Number of locations per day (mean±SD)	Total tracked movement distance (km)*	Abbreviation	Geographical range	Captured location	Capture date
4A69F6	2014	Bean Goose	2	Backpack	HQXS BP3527	GPS	27	670	28.3	23.11±3.23	2581.3	BnGoo_EA	Eastern China - Eastern Russia	Dongting Lake, China	Mar, 2014
AACN03	2014	Bean Goose	5	Backpack	ECOTONE Crane-A	GPS	52	430	69	6.15±2.17	3605.7	BnGoo_EA	Eastern China - Eastern Russia	Anhui Lakes, China	Feb, 2014
AACN07	2014	Bean Goose	3	Backpack	ECOTONE Crane-A	GPS	52	207	36	5.60±2.08	3004.6	BnGoo_EA	Eastern China - Eastern Russia	Anhui Lakes, China	Feb, 2014
AACN12	2014	Bean Goose	2	Backpack	ECOTONE Crane-A	GPS	52	25	8.3	2.78±0.84	1487.4	BnGoo_EA	Eastern China - Eastern Russia	Anhui Lakes, China	Feb, 2014
AACN13	2014	Bean Goose	4	Backpack	ECOTONE Crane-A	GPS	52	304	55.8	5.34±2.03	3235.7	BnGoo_EA	Eastern China - Eastern Russia	Anhui Lakes, China	Feb, 2014
APCN03	2016	Bean Goose	4	Collar	ECOTONE IBIS	GPS	44	368	91.5	4.00±0.47	6632.7	BnGoo_EA	Eastern China - Eastern Russia	Anhui Lakes, China	Nov, 2015
APCN10	2016	Bean Goose	2	Collar	ECOTONE IBIS	GPS	44	197	48.6	4.03±0.63	2814.3	BnGoo_EA	Eastern China - Eastern Russia	Anhui Lakes, China	Nov, 2015
SWAG16	2016	Bean Goose	5	Collar	ECOTONE IBIS	GPS	44	287	71.8	3.94±0.70	6597.9	BnGoo_EA	Eastern China - Eastern Russia	Anhui Lakes, China	Dec, 2015
vetch1504	2016	Bean Goose	4	Backpack	KoEco Backpack	GPS	50	783	65.2	11.87±0.83	5680.2	BnGoo_EA	Eastern China - Eastern Russia	Poyang Lake, China	Dec, 2015
vetch1505	2016	Bean Goose	5	Backpack	KoEco Backpack	GPS	50	715	59.5	11.92±0.47	3845.2	BnGoo_EA	Eastern China - Eastern Russia	Poyang Lake, China	Dec, 2015
BYH005	2015	Greater White-fronted Goose	1	Backpack	HQXS BP3527	GPS	27	941	40.9	22.41±4.92	2696.4	GWGoo_EA	Eastern China - Eastern Russia	Poyang Lake, China	Feb, 2015
BYH011	2015	Greater White-fronted Goose	2	Backpack	HQXS BP3527	GPS	27	167	32.2	8.36±3.41	3252.2	GWGoo_EA	Eastern China - Eastern Russia	Poyang Lake, China	Dec, 2014
BYH021	2015	Greater White-fronted Goose	1	Backpack	HQXS BP3527	GPS	27	815	50.8	16.64±4.19	4724.7	GWGoo_EA	Eastern China - Eastern Russia	Poyang Lake, China	Dec, 2014
BYH024	2015	Greater White-fronted Goose	4	Backpack	HQXS BP3527	GPS	27	1715	91.5	19.49±4.35	7130.2	GWGoo_EA	Eastern China - Eastern Russia	Poyang Lake, China	Dec, 2014
BYH027	2015	Greater White-fronted Goose	5	Backpack	HQXS BP3527	GPS	27	1152	70.7	17.46±5.48	7389.3	GWGoo_EA	Eastern China - Eastern Russia	Poyang Lake, China	Dec, 2014
CAS002	2015	Greater White-fronted Goose	7	Backpack	HQXS BP3527	GPS	27	1623	72.5	21.94±4.54	7342.1	GWGoo_EA	Eastern China - Eastern Russia	Poyang Lake, China	Jan, 2015
CAS002	2016	Greater White-fronted Goose	6	Backpack	HQXS BP3527	GPS	27	1659	73	22.42±3.48	7840.7	GWGoo_EA	Eastern China - Eastern Russia	Poyang Lake, China	Jan, 2015
CAS003	2015	Greater White-fronted Goose	5	Backpack	HQXS BP3527	GPS	27	1109	46.7	23.11±3.50	3017.7	GWGoo_EA	Eastern China - Eastern Russia	Poyang Lake, China	Jan, 2015
CAS056	2015	Greater White-fronted Goose	5	Backpack	HQXS BP3527	GPS	27	1259	54.2	22.90±3.50	4499	GWGoo_EA	Eastern China - Eastern Russia	Poyang Lake, China	Mar, 2015
CAS083	2015	Greater White-fronted Goose	4	Collar	HQXS HQNN	GPS	26	91	54.3	3.04±1.83	2412.6	GWGoo_EA	Eastern China - Eastern Russia	Poyang Lake, China	Mar, 2015
CAS089	2016	Greater White-fronted Goose	5	Backpack	HQXS BP3527	GPS	27	1107	49.6	21.71±4.96	3611.2	GWGoo_EA	Eastern China - Eastern Russia	Anhui Lakes, China	Oct, 2015
CAS090	2016	Greater White-fronted Goose	5	Backpack	HQXS BP3527	GPS	27	1486	65.8	22.18±3.62	7382.5	GWGoo_EA	Eastern China - Eastern Russia	Anhui Lakes, China	Oct, 2015
CAS091	2016	Greater White-fronted Goose	6	Backpack	HQXS BP3527	GPS	27	2961	126.7	23.32±1.75	4064	GWGoo_EA	Eastern China - Eastern Russia	Anhui Lakes, China	Oct, 2015
CAS092	2016	Greater White-fronted Goose	8	Backpack	HQXS BP3527	GPS	27	1928	89.2	21.43±5.05	6760.1	GWGoo_EA	Eastern China - Eastern Russia	Anhui Lakes, China	Oct, 2015
CAS093	2016	Greater White-fronted Goose	2	Backpack	HQXS BP3527	GPS	27	273	11.6	22.75±2.50	2815.4	GWGoo_EA	Eastern China - Eastern Russia	Anhui Lakes, China	Oct, 2015
CAS094	2016	Greater White-fronted Goose	1	Backpack	HQXS BP3527	GPS	27	15	2.4	5.00±4.00	1783.1	GWGoo_EA	Eastern China - Eastern Russia	Anhui Lakes, China	Oct, 2015
CAS096	2016	Greater White-fronted Goose	6	Backpack	HQXS BP3527	GPS	27	1330	71.5	18.22±6.54	6842.8	GWGoo_EA	Eastern China - Eastern Russia	Anhui Lakes, China	Oct, 2015
CAS097	2016	Greater White-fronted Goose	5	Backpack	HQXS BP3527	GPS	27	2169	92.8	23.08±3.26	6730.6	GWGoo_EA	Eastern China - Eastern Russia	Anhui Lakes, China	Oct, 2015
CAS187	2016	Greater White-fronted Goose	2	Collar	HQXS HQNN	GPS	26	770	44.3	17.12±9.61	5305.5	GWGoo_EA	Eastern China - Eastern Russia	Poyang Lake, China	Dec, 2015
CAS199	2016	Greater White-fronted Goose	2	Collar	HQXS HQNN	GPS	26	67	15.6	4.19±0.76	2552.5	GWGoo_EA	Eastern China - Eastern Russia	Poyang Lake, China	Dec, 2015
CAS217	2016	Greater White-fronted Goose	6	Collar	HQXS HQNN	GPS	26	950	51.3	18.27±8.63	4741.9	GWGoo_EA	Eastern China - Eastern Russia	Poyang Lake, China	Dec, 2015
CAS219	2016	Greater White-fronted Goose	3	Collar	HQXS HQNN	GPS	26	76	16.8	4.23±1.40	3517.7	GWGoo_EA	Eastern China - Eastern Russia	Poyang Lake, China	Dec, 2015
CAS221	2016	Greater White-fronted Goose	5	Collar	HQXS HQNN	GPS	26	790	48.6	16.13±7.74	6467	GWGoo_EA	Eastern China - Eastern Russia	Poyang Lake, China	Dec, 2015
CAS223	2016	Greater White-fronted Goose	2	Collar	HQXS HQNN	GPS	26	1040	50.9	20.00±5.88	5469.1	GWGoo_EA	Eastern China - Eastern Russia	Poyang Lake, China	Dec, 2015
CAS224	2016	Greater White-fronted Goose	1	Collar	HQXS HQNN	GPS	26	1277	103.9	12.17±8.67	4918.9	GWGoo_EA	Eastern China - Eastern Russia	Poyang Lake, China	Dec, 2015
CAS226	2016	Greater White-fronted Goose	3	Collar	HQXS HQNN	GPS	26	948	53.8	17.24±9.39	4694.8	GWGoo_EA	Eastern China - Eastern Russia	Poyang Lake, China	Dec, 2015
CAS228	2016	Greater White-fronted Goose	4	Collar	HQXS HQNN	GPS	26	873	45.8	18.58±6.00	4503.6	GWGoo_EA	Eastern China - Eastern Russia	Poyang Lake, China	Dec, 2015
CAS229	2016	Greater White-fronted Goose	2	Collar	HQXS HQNN	GPS	26	992	51	19.08±7.54	5513.1	GWGoo_EA	Eastern China - Eastern Russia	Poyang Lake, China	Dec, 2015
CAS231	2016	Greater White-fronted Goose	3	Collar	HQXS HQNN	GPS	26	1019	51.3	19.23±6.33	5347.8	GWGoo_EA	Eastern China - Eastern Russia	Poyang Lake, China	Dec, 2015
CAS232	2016	Greater White-fronted Goose	4	Collar	HQXS HQNN	GPS	26	743	44.7	16.52±6.54	4773.8	GWGoo_EA	Eastern China - Eastern Russia	Poyang Lake, China	Dec, 2015
CAS234	2016	Greater White-fronted Goose	5	Collar	HQXS HQNN	GPS	26	748	65.5	11.17±8.20	7224.5	GWGoo_EA	Eastern China - Eastern Russia	Poyang Lake, China	Dec, 2015
CAS057	2015	Swan Goose	1	Backpack	HQXS BP3527	GPS	27	1072	54.9	20.62±5.38	2733.5	SGoo_EA	Eastern China - Eastern Russia	Poyang Lake, China	Feb, 2015
CAS062	2015	Swan Goose	3	Backpack	HQXS BP3527	GPS	27	650	35.8	17.57±7.01	2429.7	SGoo_EA	Eastern China - Eastern Russia	Poyang Lake, China	Feb, 2015
CAS184	2016	Swan Goose	4	Collar	HQXS HQNN	GPS	26	112	31.3	3.62±0.81	3302.3	SGoo_EA	Eastern China - Eastern Russia	Poyang Lake, China	Dec, 2015
CAS186	2016	Swan Goose	2	Collar	HQXS HQNN	GPS	26	52	12.3	4.00±0.92	2422.4	SGoo_EA	Eastern China - Eastern Russia	Poyang Lake, China	Dec, 2015
CAS197	2016	Swan Goose	4	Collar	HQXS HQNN	GPS	26	305	45.4	6.64±4.85	4034.5	SGoo_EA	Eastern China - Eastern Russia	Poyang Lake, China	Dec, 2015
SWAG01	2016	Swan Goose	5	Collar	ECOTONE IBIS	GPS	44	293	72	4.02±0.83	3171.1	SGoo_EA	Eastern China - Eastern Russia	Gulaat Lake, Mongolia	Jul, 2014
SWAG11	2015	Swan Goose	3	Collar	ECOTONE IBIS	GPS	44	138	34.3	3.95±0.84	3011.2	SGoo_EA	Eastern China - Eastern Russia	Bus Lake, Mongolia	Jul, 2014
vetch1509	2016	Swan Goose	5	Backpack	KoEco Backpack	GPS	50	432	36	11.68±1.46	3426	SGoo_EA	Eastern China - Eastern Russia, North Europe	Poyang Lake, China	Dec, 2015
vetch1510	2016	Swan Goose	1	Backpack	KoEco Backpack	GPS	50	196	16.3	11.53±1.51	1393.3	SGoo_EA	Eastern China - Eastern Russia, North Europe	Poyang Lake, China	Dec, 2015
4AD894	2014	Tundra Swan	2	Backpack	HQXS BP3527	GPS	27	710	24.3	27.31±29.23	2410.8	TSwan_EA	Eastern China - Eastern Russia, North Europe	Dongting Lake, China	Mar, 2014
A8622E	2014	Tundra Swan	2	Backpack	HQXS BP3527	GPS	27	257	11.1	21.42±5.69	1728	TSwan_EA	Eastern China - Eastern Russia, North Europe	Dongting Lake, China	Mar, 2014
CAS005	2015	Tundra Swan	3	Backpack	HQXS BP3527	GPS	27	456	20.5	21.72±5.48	1799.5	TSwan_EA	Eastern China - Eastern Russia, North Europe	Anhui Lakes, China	Feb, 2015
CAS005(PYH)	2015	Tundra Swan	1	Backpack	HQXS BP3527	GPS	27	320	14.6	21.34±2.67	1112.8	TSwan_EA	Eastern China - Eastern Russia, North Europe	Anhui Lakes, China	Dec, 2014
CAS006	2015	Tundra Swan	3	Backpack	HQXS BP3527	GPS	27	1063	51.1	20.85±6.43	3210.7	TSwan_EA	Eastern China - Eastern Russia, North Europe	Anhui Lakes, China	Feb, 2015
CAS009	2015	Tundra Swan	1	Backpack	HQXS BP3527	GPS	27	494	22.4	20.59±7.27	1226.7	TSwan_EA	Eastern China - Eastern Russia, North Europe	Anhui Lakes, China	Feb, 2015
CAS010	2015	Tundra Swan	1	Backpack	HQXS BP3527	GPS	27	125	5.4	17.86±9.14	1154.6	TSwan_EA	Eastern China - Eastern Russia, North Europe	Anhui Lakes, China	Feb, 2015
CAS011	2015	Tundra Swan	1	Backpack	HQXS BP3527	GPS	27	196	8.3	21.78±3.64	1378.2	TSwan_EA	Eastern China - Eastern Russia, North Europe	Anhui Lakes, China	Feb, 2015
CAS011(PYH)	2015	Tundra Swan	3	Backpack	HQXS BP3527	GPS	27	657	39.5	17.29±6.34	2554.5	TSwan_EA	Eastern China - Eastern Russia, North Europe	Anhui Lakes, China	Dec, 2014
CAS012	2015	Tundra Swan	4	Backpack	HQXS BP3527	GPS	27	854	45.3	18.57±5.44	2461.6	TSwan_EA	Eastern China - Eastern Russia, North Europe	Anhui Lakes, China	Feb, 2015
CAS142	2016	Tundra Swan	1	Collar	HQXS HQNN	GPS	26	36	10.9	3.00±1.42	2094	TSwan_EA	Eastern China - Eastern Russia, North Europe	Poyang Lake, China	Mar, 2016
CAS143	2016	Tundra Swan	3	Collar	HQXS HQNN	GPS	26	99	35	2.75±1.06	2534.4	TSwan_EA	Eastern China - Eastern Russia, North Europe	Poyang Lake, China	Mar, 2016
vetch1514	2016	Tundra Swan	4	Backpack	KoEco Backpack	GPS	50	748	62.3	11.88±1.01	3018.4	TSwan_EA	Eastern China - Eastern Russia, North Europe	Poyang Lake, China	Mar, 2016
VTN1602	2016	Mallard	3	Backpack	KoEco Backpack	GPS	50	256	42.5	5.82±0.87	1224	Mal_EA	Eastern China - Northeastern China	Cheongmicheon River, South Korea	Feb, 2016
VTN1603	2016	Mallard	3	Backpack	KoEco Backpack	GPS	50	352	58.7	5.87±0.66	1793.4	Mal_EA	Eastern China - Northeastern China	Cheongmicheon River, South Korea	Feb, 2016
VTN1604	2016	Mallard	4	Backpack	KoEco Backpack	GPS	50	411	68.4	5.88±0.76	2379.2	Mal_EA	Eastern China - Northeastern China	Cheongmicheon River, South Korea	Feb, 2016
VTN1605	2016	Mallard	2	Backpack	KoEco Backpack	GPS	50	110	18.2	5.79±0.92	1099.4	Mal_EA	Eastern China - Northeastern China	Cheongmicheon River, South Korea	Feb, 2016
VTN1606	2016	Mallard	2	Backpack	KoEco Backpack	GPS	50	221	36.7	5.82±0.81	1286.8	Mal_EA	Eastern China - Northeastern China	Cheongmicheon River, South Korea	Feb, 2016
VTN1608	2016	Mallard	2	Backpack	KoEco Backpack	GPS	50	153	26	5.67±0.84	1489.3	Mal_EA	Eastern China - Northeastern China	Cheongmicheon River, South Korea	Feb, 2016
VTN1613	2016	Mallard	5	Backpack	KoEco Backpack	GPS	50	303	50.4	5.95±0.43	2238	Mal_EA	Eastern China - Northeastern China	Cheongmicheon River, South Korea	Feb, 2016
BLO04	2014	Bean Goose	1	Collar	Ecotone IBIS	GPS	28g	654	41.1	15.58±1.79	2071.6	BnGoo_Sca	Western Europe - Central Scandinavia	Slamannan, Falkirk	Oct, 2013
FAB13	2016	Bean Goose	1	Collar	Ecotone IBIS	GPS	38g	681	61.9	10.99±3.80	2235.4	BnGoo_Sca	Western Europe - Central Scandinavia	Slamannan, Falkirk	Oct, 2013
UCOL06a	2014	Bean Goose	4	Collar	Ecotone IBIS	GPS	42g	631	41.6	14.68±9.03	2531.1	BnGoo_Sca	Western Europe - Central Scandinavia	Slamannan, Falkirk	Oct, 2013
UCOL07	2014	Bean Goose	2	Collar	Ecotone IBIS	GPS	42g	614	46.2	13.07±8.45	2213.9	BnGoo_Sca	Western Europe - Central Scandinavia	Slamannan, Falkirk	Oct, 2012
UCOL27	2016	Bean Goose	2	Collar	Ecotone IBIS	GPS	28g	510	61.9	8.10±6.12	1728.4	BnGoo_Sca	Western Europe - Central Scandinavia	Slamannan, Falkirk	Oct, 2015
UCOL29	2016	Bean Goose	2	Collar	Ecotone IBIS	GPS	28g	3030	61.8	48.88±14.73	2014.9	BnGoo_Sca	Western Europe - Central Scandinavia	Slamannan, Falkirk	Oct, 2015
UCOL30	2016	Bean Goose	2	Collar	Ecotone IBIS	GPS	28g	975	61.8	15.73±19.27	1689.4	BnGoo_Sca	Western Europe - Central Scandinavia	Slamannan, Falkirk	Oct, 2015
78200	2008	Greater White-fronted Goose	1	Backpack	MTI solar ARGOS PTT	GPS+Argos*	55g	233	27.9	8.04±1.85	3462.4	GWGoo_Gre	Western Europe - Greenland	Loch Ken, Dumfries & Galloway	Feb, 2008
78201	2008	Greater White-fronted Goose	1	Backpack	MTI solar ARGOS PTT	GPS+Argos	55g	220	26.7	7.86±2.04	3096	GWGoo_Gre	Western Europe - Greenland	Loch Ken, Dumfries & Galloway	Feb, 2008
78376	2008	Greater White-fronted Goose	1	Backpack	MTI solar ARGOS PTT	GPS+Argos	55g	229	25.5	8.49±2.05	3596.4	GWGoo_Gre	Western Europe - Greenland	Loch Ken, Dumfries & Galloway	Feb, 2008
BLO09	2015	Greater White-fronted Goose	2	Collar	Ecotone IBIS	GPS	28g	425	31.1	13.29±2.57	4241.7	GWGoo_Gre	Western Europe - Greenland	Islay, Argyll	Jan, 2015
BLO19	2014	Greater White-fronted Goose	1	Collar	Ecotone IBIS	GPS	28g	172	22.9	7.17±1.77	2838.9	GWGoo_Gre	Western Europe - Greenland	Islay, Argyll	Jan, 2014
BLO19	2015	Greater White-fronted Goose	1	Collar	Ecotone IBIS	GPS	28g	318	34.7	8.84±2.29	2864.8	GWGoo_Gre	Western Europe - Greenland	Islay, Argyll	Jan, 2014
BLO19	2016	Greater White-fronted Goose	1	Collar	Ecotone IBIS	GPS	28g	125	23.9	5.00±1.76	2829.7	GWGoo_Gre	Western Europe - Greenland	Islay, Argyll	Jan, 2014
BLO21	2014	Greater White-fronted Goose	2	Collar	Ecotone IBIS	GPS	28g	224	30.9	7.00±1.42	3400.7	GWGoo_Gre	Western Europe - Greenland	Islay, Argyll	Nov, 2013
BLO21	2015	Greater White-fronted Goose	1	Collar	Ecotone IBIS	GPS	28g	231	26	8.89±1.71	2903.2	GWGoo_Gre	Western Europe - Greenland	Islay, Argyll	Nov, 2013
BLO22	2014	Greater White-fronted Goose	1	Collar	Ecotone IBIS	GPS	28g	181	25	6.97±1.74	3318.4	GWGoo_Gre	Western Europe - Greenland	Islay, Argyll	Nov, 2013
BLO22	2015	Greater White-fronted Goose	1	Collar	Ecotone IBIS	GPS	28g	242	26.1	8.97±2.25	2988.1	GWGoo_Gre	Western Europe - Greenland	Islay, Argyll	Nov, 2013
BLO27	2014	Greater White-fronted Goose	2	Collar	Ecotone IBIS	GPS	28g	397	27.7	13.69±3.40	3628	GWGoo_Gre	Western Europe - Greenland	Islay, Argyll	Jan, 2014
BLO28	2015	Greater White-fronted Goose	2	Collar	Ecotone IBIS	GPS	28g	425	33.5	12.15±2.97	3300.1	GWGoo_Gre	Western Europe - Greenland	Islay, Argyll	Nov, 2014
BLO29	2015	Greater White-fronted Goose	2	Collar	Ecotone IBIS	GPS	28g	148	30.7	4.78±0.57	3491.8	GWGoo_Gre	Western Europe - Greenland	West Freugh, Dumfries & Galloway	Dec, 2014
BLO29	2016	Greater White-fronted Goose	2	Collar	Ecotone IBIS	GPS	28g	137	30.7	4.29±1.23	3285.4	GWGoo_Gre	Western Europe - Greenland	West Freugh, Dumfries & Galloway	Dec, 2014
HAR04a	2013	Greater White-fronted Goose	1	Collar	Ecotone IBIS	GPS	28g	138	28.1	4.76±0.92	2735.5	GWGoo_Gre	Western Europe - Greenland	Islay, Argyll	Nov, 2015
HAR04a	2014	Greater White-fronted Goose	2	Collar	Ecotone IBIS	GPS	28g	240	31.1	7.50±1.61	2992.5	GWGoo_Gre	Western Europe - Greenland	Islay, Argyll	Nov, 2015
HAR04a	2016	Greater White-fronted Goose	1	Collar	Ecotone IBIS	GPS	28g	123	26.9	4.56±1.29	2810.4	GWGoo_Gre	Western Europe - Greenland	Islay, Argyll	Nov, 2015
HAR04b	2015	Greater White-fronted Goose	1	Collar	Ecotone IBIS	GPS	38g	361	37	9.51±1.74	3238	GWGoo_Gre	Western Europe - Greenland	Islay, Argyll	Jan, 2015
HAR04b	2016	Greater White-fronted Goose	1	Collar	Ecotone IBIS	GPS	38g	346	36.7	9.11±2.46	3134.3	GWGoo_Gre	Western Europe - Greenland	Islay, Argyll	Jan, 2015
HAR27	2015	Greater White-fronted Goose	1	Collar	Ecotone IBIS	GPS	28g	389	40.2	9.49±1.68	3450.2	GWGoo_Gre	Western Europe - Greenland	Islay, Argyll	Nov, 2014
HAR27	2016	Greater White-fronted Goose	1	Collar	Ecotone IBIS	GPS	28g	237	25.7	8.78±2.85	3038.1	GWGoo_Gre	Western Europe - Greenland	Islay, Argyll	Nov, 2014
UCOL04	2013	Greater White-fronted Goose	1	Collar	Ecotone IBIS	GPS	42g	148	20.2	7.05±1.83	3291.4	GWGoo_Gre	Western Europe - Greenland	Islay, Argyll	Dec, 2012
UCOL20	2014	Greater White-fronted Goose	1	Collar	Ecotone IBIS	GPS	28g	412	23.3	16.48±9.69	3053.5	GWGoo_Gre	Western Europe - Greenland	Islay, Argyll	Jan, 2014
UCOL20a	2015	Greater White-fronted Goose	1	Collar	Ecotone IBIS	GPS	28g	266	24.9	10.24±5.44	3139.7	GWGoo_Gre	Western Europe - Greenland	Islay, Argyll	Nov, 2014
UCOL20a	2016	Greater White-fronted Goose	2	Collar	Ecotone IBIS	GPS	28g	265	26.9	9.47±10.42	3775.6	GWGoo_Gre	Western Europe - Greenland	Islay, Argyll	Nov, 2014
UCOL24	2015	Greater White-fronted Goose	1	Collar	Ecotone IBIS	GPS	28g	222	24.9	8.54±3.52	3214.9	GWGoo_Gre	Western Europe - Greenland	Islay, Argyll	Nov, 2014
UCOL25	2015	Greater White-fronted Goose	1	Collar	Ecotone IBIS	GPS	28g	582	28	20.07±13.37	3338.5	GWGoo_Gre	Western Europe - Greenland	Islay, Argyll	Nov, 2014
